# Supplementary material for: How many human genes can be defined as housekeeping with current expression data?
Source: PubMed Central journal article supplement (PMC2396180; doi:10.1186/1471-2164-9-172), 2008-04-16
Supplement: 1471-2164-9-172-S2.pdf [file 1471-2164-9-172-S2.pdf]

## Additional File 2

Additional file 2 provides detailed descriptions of the 408 manually-curated housekeeping genes.

### Transcription Pre-initiation Complex (PIC) – 40 genes

| General Description        | Reactome Description                                             | Symbol        | GeneID       | RefSeq Acc   |
|----------------------------|------------------------------------------------------------------|---------------|--------------|--------------|
| TFIID                      | TBP                                                              | <i>TBP</i>    | 6908         | NM_003194    |
|                            | Transcription initiation factor TFIID 250 kDa subunit            | <i>TAF1</i>   | 6872         | NM_138923    |
|                            | Transcription initiation factor TFIID 135 kDa subunit            | <i>TAF4</i>   | 6874         | NM_003185    |
|                            | Transcription initiation factor TFIID 105 kDa subunit            | <i>TAF4B</i>  | 6875         | NM_005640    |
|                            | Transcription initiation factor TFIID 100 kDa subunit            | <i>TAF5</i>   | 6877         | NM_006951    |
|                            | Transcription initiation factor TFIID 70 kDa subunit             | <i>TAF6</i>   | 6878         | NM_005641    |
|                            | Transcription initiation factor TFIID 55 kDa subunit             | <i>TAF7</i>   | 6879         | NM_005642    |
|                            | Transcription initiation factor TFIID 31 kDa subunit             | <i>TAF9</i>   | 6880         | NM_001015892 |
|                            | Transcription initiation factor TFIID 30 kDa subunit             | <i>TAF10</i>  | 6881         | NM_006284    |
|                            | Transcription initiation factor TFIID 28 kDa subunit             | <i>TAF11</i>  | 6882         | NM_005643    |
|                            | Transcription initiation factor TFIID 20/15 kDa subunit          | <i>TAF12</i>  | 6883         | NM_005644    |
|                            | Transcription initiation factor TFIID 18 kDa subunit             | <i>TAF13</i>  | 6884         | NM_005645    |
|                            | TFIIB                                                            | TFIIB         | <i>GTF2B</i> | 2959         |
| TFIIA                      | Transcription Factor IIA alpha chain - p35                       | <i>GTF2A1</i> | 2957         | NM_015859    |
|                            | Transcription Factor IIA beta chain - p19                        | <i>GTF2A1</i> | 2957         | NM_015859    |
|                            | Transcription initiation factor IIA gamma chain                  | <i>GTF2A2</i> | 2958         | NM_004492    |
| RNA Pol II                 | RNA Pol II (unphosphorylated) largest subunit                    | <i>POLR2A</i> | 5430         | NM_000937    |
|                            | DNA-directed RNA polymerase II 140 kDa polypeptide               | <i>POLR2B</i> | 5431         | NM_000938    |
|                            | DNA-directed RNA polymerase II 33 kDa polypeptide                | <i>POLR2C</i> | 5432         | NM_032940    |
|                            | DNA-directed RNA polymerase II 16 kDa polypeptide                | <i>POLR2D</i> | 5433         | NM_004805    |
|                            | HsRPABC1                                                         | <i>POLR2E</i> | 5434         | NM_002695    |
|                            | HsRPABC2                                                         | <i>POLR2F</i> | 5435         | NM_021974    |
|                            | DNA-directed RNA polymerase II 19 kDa polypeptide                | <i>POLR2G</i> | 5436         | NM_002696    |
|                            | DNA-directed RNA polymerases I, II, and III 17.1 kDa polypeptide | <i>POLR2H</i> | 5437         | NM_006232    |
|                            | DNA-directed RNA polymerase II 14.5 kDa polypeptide              | <i>POLR2I</i> | 5438         | NM_006233    |
|                            | DNA-directed RNA polymerase II 13.3 kDa polypeptide              | <i>POLR2J</i> | 5439         | NM_006234    |
|                            | DNA-directed RNA polymerases I, II, and III 7.0 kDa polypeptide  | <i>POLR2K</i> | 5440         | NM_005034    |
|                            | HsRPABC5                                                         | <i>POLR2L</i> | 5441         | NM_021128    |
| TFIIF                      | Transcription initiation factor IIF, alpha subunit               | <i>GTF2F1</i> | 2962         | NM_002096    |
|                            | Transcription initiation factor IIF, beta subunit                | <i>GTF2F2</i> | 2963         | NM_004128    |
| TFIIE                      | Transcription initiation factor IIE, alpha subunit               | <i>GTF2E1</i> | 2960         | NM_005513    |
|                            | Transcription initiation factor IIE, beta subunit                | <i>GTF2E2</i> | 2961         | NM_002095    |
| TFIIH                      | (CAK) Cdk7                                                       | <i>CDK7</i>   | 1022         | NM_001799    |
|                            | (CAK) Cyclin H                                                   | <i>CCNH</i>   | 902          | NM_001239    |
|                            | (CAK) MAT1                                                       | <i>MNAT1</i>  | 4331         | NM_002431    |
|                            | XPD protein                                                      | <i>ERCC2</i>  | 2068         | NM_000400    |
|                            | XPB protein                                                      | <i>ERCC3</i>  | 2071         | NM_000122    |
|                            | TFIIH basal transcription factor complex p62 subunit             | <i>GTF2H1</i> | 2965         | NM_005316    |
|                            | BTF2-p44 (TFIIH component)                                       | <i>GTF2H2</i> | 2966         | NM_001515    |
|                            | BTF2-p34 (TFIIH component)                                       | <i>GTF2H3</i> | 2967         | NM_001516    |
| BTF2-p52 (TFIIH component) | <i>GTF2H4</i>                                                    | 2968          | NM_001517    |              |

## Transcription Elongation Complex – 17 genes

| General Description | Reactome Description                    | Symbol               | GeneID | RefSeq Acc |
|---------------------|-----------------------------------------|----------------------|--------|------------|
| FCP1P               | FCP1P protein                           | <i>CTDP1</i>         | 9150   | NM_004715  |
| DSIF                | SPT4H1 protein                          | <i>SUPT4H1</i>       | 6827   | NM_003168  |
|                     | SUPT5H protein                          | <i>SUPT5H</i>        | 6829   | NM_003169  |
| NELF                | NELF-A protein                          | <i>WHSC2</i>         | 7469   | NM_005663  |
|                     | NELF-B protein                          | <i>RP13-122B23.3</i> | 25920  | NM_015456  |
|                     | NELF-C/D protein                        | <i>TH1L</i>          | 51497  | NM_198976  |
|                     | RD protein                              | <i>RDBP</i>          | 7936   | NM_002904  |
| P-TEFb              | Cyclin T1                               | <i>CCNT1</i>         | 904    | NM_001240  |
|                     | Cyclin T2                               | <i>CCNT2</i>         | 905    | NM_058241  |
|                     | Cdk 9 protein                           | <i>CDK9</i>          | 1025   | NM_001261  |
| TFIIS               | TFIIS protein                           | <i>TCEA1</i>         | 6917   | NM_201437  |
| ELL                 | RNA polymerase II elongation factor ELL | <i>ELL</i>           | 8178   | NM_006532  |
| FACT complex        | FACT 80 kDa subunit                     | <i>SSRP1</i>         | 6749   | NM_003146  |
|                     | FACT 140 kDa subunit                    | <i>SUPT16H</i>       | 11198  | NM_007192  |
| Elongin complex     | Elongin B protein                       | <i>TCEB1</i>         | 6921   | NM_005648  |
|                     | Elongin C protein                       | <i>TCEB2</i>         | 6923   | NM_007108  |
|                     | Elongin A1 protein                      | <i>TCEB3</i>         | 6924   | NM_003198  |

## Essential Splicing Factor – 31 genes

| General Description | Reactome Description                        | Symbol         | GeneID    | RefSeq Acc   |
|---------------------|---------------------------------------------|----------------|-----------|--------------|
| U2AF                | U2AF 35 kDa subunit                         | <i>U2AF1</i>   | 7307      | NM_006758    |
|                     | U2AF 65 kDa subunit                         | <i>U2AF2</i>   | 11338     | NM_007279    |
| Splicing factors    | SF2/ASF/SFRS1                               | <i>SFRS1</i>   | 6426      | NM_006924    |
|                     | SR2 / SC35                                  | <i>SFRS2</i>   | 6427      | NM_003016    |
|                     | SRp20                                       | <i>SFRS3</i>   | 6428      | NM_003017    |
|                     | SR4 / SRp75                                 | <i>SFRS4</i>   | 6429      | NM_005626    |
|                     | SRp40                                       | <i>SFRS5</i>   | 6430      | NM_006925    |
|                     | SRp55                                       | <i>SFRS6</i>   | 6431      | NM_006275    |
|                     | SR7/ 9G8 protein                            | <i>SFRS7</i>   | 6432      | NM_001031684 |
|                     | SR9 / SRp30                                 | <i>SFRS9</i>   | 8683      | NM_003769    |
|                     | SR 11/ p54                                  | <i>SFRS11</i>  | 9295      | NM_004768    |
|                     | SF1/BBP (Branch binding protein)            | <i>SF1</i>     | 7536      | NM_201998    |
|                     | SURP 2, G patch protein                     | <i>SF4</i>     | 57794     | NM_172231    |
|                     | DDX9/NDH II                                 | <i>DHX9</i>    | 1660      | NM_001357    |
|                     | FUS - RNA binding protein/TLS               | <i>FUS</i>     | 2521      | NM_004960    |
|                     | YB-1                                        | <i>YBX1</i>    | 4904      | NM_004559    |
|                     | FLJ10839 DNA-binding protein                | <i>CCAR1</i>   | 55749     | NM_018237    |
|                     | RBM 5                                       | <i>RBM5</i>    | 10181     | NM_005778    |
|                     | E1B-AP5 nucleocytoplasmic transport protein | <i>HNRPUL1</i> | 11100     | NM_007040    |
|                     | CD2BP2 - GYF                                | <i>CD2BP2</i>  | 10421     | NM_006110    |
|                     | SMC1 (BAA11495)                             | <i>SMC1A</i>   | 8243      | NM_006306    |
|                     | THOC4(Aly/Ref)                              | <i>THOC4</i>   | 10189     | NM_005782    |
|                     | SRm160                                      | <i>SRRM1</i>   | 10250     | NM_005839    |
|                     | RNPS1                                       | <i>RNPS1</i>   | 10921     | NM_006711    |
|                     | NFX.1                                       | <i>NFX1</i>    | 4799      | NM_002504    |
|                     | hPrp16                                      | <i>DHX38</i>   | 9785      | NM_014003    |
|                     | hPrp17                                      | <i>CDC40</i>   | 51362     | NM_015891    |
|                     | SPF31 (Dna J)                               | <i>DNAJC8</i>  | 22826     | NM_014280    |
| hUpf3B              | <i>UPF3B</i>                                | 65109          | NM_023010 |              |
| Magoh-Y14 complex   | magoh                                       | <i>MAGOH</i>   | 4116      | NM_002370    |
|                     | RBM8A/Y14                                   | <i>RBM8A</i>   | 9939      | NM_005105    |

## hnRNP – 18 genes

| General Description | Reactome Description | Symbol          | GeneID    | RefSeq Acc   |
|---------------------|----------------------|-----------------|-----------|--------------|
| hnRNP               | hnRNP A0             | <i>HNRPA0</i>   | 10949     | NM_006805    |
|                     | hnRNP A1             | <i>HNRPA1</i>   | 3178      | NM_031157    |
|                     | hnRNP A2             | <i>HNRPA2B1</i> | 3181      | NM_031243    |
|                     | hnRNP A3             | <i>HNRPA3</i>   | 220988    | NM_194247    |
|                     | hnRNP C1/C2          | <i>HNRPC</i>    | 3183      | NM_001077442 |
|                     | hnRNP D0             | <i>HNRPD</i>    | 3184      | NM_031370    |
|                     | hnRNP F              | <i>HNRPF</i>    | 3185      | NM_004966    |
|                     | hnRNP G              | <i>RBMX</i>     | 27316     | NM_002139    |
|                     | hnRNP H              | <i>HNRPH1</i>   | 3187      | NM_005520    |
|                     | hnRNP H'             | <i>HNRPH2</i>   | 3188      | NM_001032393 |
|                     | hnRNP I              | <i>PTBP1</i>    | 5725      | NM_031991    |
|                     | hnRNP K              | <i>HNRPK</i>    | 3190      | NM_031262    |
|                     | hnRNP L              | <i>HNRPL</i>    | 3191      | NM_001533    |
|                     | hnRNP M              | <i>HNRPM</i>    | 4670      | NM_005968    |
|                     | hnRNP R              | <i>HNRPR</i>    | 10236     | NM_005826    |
|                     | hnRNP U              | <i>HNRPU</i>    | 3192      | NM_004501    |
| hnRNP-E1            | <i>PCBP1</i>         | 5093            | NM_006196 |              |
| hnRNP-E2            | <i>PCBP2</i>         | 5094            | NM_005016 |              |

## U1, U2, U4, U5, U6, U11, U12 snRNP – 32 genes

| General Description                 | Reactome Description                   | Symbol         | GeneID | RefSeq Acc |
|-------------------------------------|----------------------------------------|----------------|--------|------------|
| snRNP core proteins                 | Sm Protein B                           | <i>SNRPB</i>   | 6628   | NM_198216  |
|                                     | Sm protein D1                          | <i>SNRPD1</i>  | 6632   | NM_006938  |
|                                     | Sm protein D2                          | <i>SNRPD2</i>  | 6633   | NM_004597  |
|                                     | Sm protein D3                          | <i>SNRPD3</i>  | 6634   | NM_004175  |
|                                     | Sm protein E                           | <i>SNRPE</i>   | 6635   | NM_003094  |
|                                     | Sm protein F                           | <i>SNRPF</i>   | 6636   | NM_003095  |
|                                     | Sm protein G                           | <i>SNRPG</i>   | 6637   | NM_003096  |
| U1 snRNP specific protein           | U1 - 70K protein                       | <i>SNRP70</i>  | 6625   | NM_003089  |
|                                     | U1 - A protein                         | <i>SNRPA</i>   | 6626   | NM_004596  |
|                                     | U1 - C protein                         | <i>SNRPC</i>   | 6631   | NM_003093  |
| U2 snRNP specific protein           | U2 A' protein                          | <i>SNRPA1</i>  | 6627   | NM_003090  |
|                                     | U2 B' protein                          | <i>SNRPB2</i>  | 6629   | NM_003092  |
|                                     | SAP 114 (Splicing factor 3A subunit 1) | <i>SF3A1</i>   | 10291  | NM_005877  |
|                                     | SAP 60 (splicing factor 3A subunit2)   | <i>SF3A2</i>   | 8175   | NM_007165  |
|                                     | SAP 61 (Splicing factor 3A subunit 3)  | <i>SF3A3</i>   | 10946  | NM_006802  |
|                                     | SAP155                                 | <i>SF3B1</i>   | 23451  | NM_012433  |
|                                     | SAP 145/ SF3b                          | <i>SF3B2</i>   | 10992  | NM_006842  |
|                                     | SAP130                                 | <i>SF3B3</i>   | 23450  | NM_012426  |
|                                     | SAP49                                  | <i>SF3B4</i>   | 10262  | NM_005850  |
|                                     | Splicing factor 3B subunit 5           | <i>SF3B5</i>   | 83443  | NM_031287  |
|                                     | p14 branch site protein                | <i>SF3B14</i>  | 51639  | NM_016047  |
|                                     | SF3b14b                                | <i>PHF5A</i>   | 84844  | NM_032758  |
| U4:U5:U6 tri-snRNP specific protein | tri-snRNP 15.5 kDa protein             | <i>NHP2L1</i>  | 4809   | NM_005008  |
|                                     | hPrp4                                  | <i>PRPF4</i>   | 9128   | NM_004697  |
|                                     | Sm-like protein LSM2                   | <i>LSM2</i>    | 57819  | NM_021177  |
|                                     | DIM1                                   | <i>TXNL4A</i>  | 10907  | NM_006701  |
|                                     | U5-40 kDa protein                      | <i>WDR57</i>   | 9410   | NM_004814  |
|                                     | U5-100 kDa protein                     | <i>DDX23</i>   | 9416   | NM_004818  |
|                                     | U5-102 kDa protein                     | <i>PRPF6</i>   | 24148  | NM_012469  |
|                                     | U5-116 kDa protein                     | <i>EFTUD2</i>  | 9343   | NM_004247  |
|                                     | U5-200kDa helicase                     | <i>ASCC3L1</i> | 23020  | NM_014014  |
|                                     | hPrp8                                  | <i>PRPF8</i>   | 10594  | NM_006445  |

## Capping Related Genes – 5 genes

| General Description | Reactome Description               | Symbol        | GeneID | RefSeq Acc |
|---------------------|------------------------------------|---------------|--------|------------|
| RPT and GT          | mRNA capping enzyme                | <i>RNGTT</i>  | 8732   | NM_003800  |
| SPT5                | Spt5 (suppressor of Ty 5 homolog ) | <i>SUPT5H</i> | 6829   | NM_003169  |
| MT                  | RNA (guanine-7-) methyltransferase | <i>RNMT</i>   | 8731   | NM_003799  |
| Cap-binding complex | CBP80                              | <i>NCBP1</i>  | 4686   | NM_002486  |
|                     | CBP20                              | <i>NCBP2</i>  | 22916  | NM_007362  |

## Cleavage and Polyadenylation Complex – 13 genes

| General Description     | Reactome Description     | Symbol          | GeneID | RefSeq Acc |
|-------------------------|--------------------------|-----------------|--------|------------|
| CPSF                    | CPSF1                    | <i>CPSF1</i>    | 29894  | NM_013291  |
|                         | CPSF2                    | <i>CPSF2</i>    | 53981  | NM_017437  |
|                         | CPSF3                    | <i>CPSF3</i>    | 51692  | NM_016207  |
|                         | CPSF4 - 30 kDa subunit   | <i>CPSF4</i>    | 10898  | NM_006693  |
| CSTF                    | CSTF 50 kDa subunit      | <i>CSTF1</i>    | 1477   | NM_001324  |
|                         | CSTF 64 kDa subunit      | <i>CSTF2</i>    | 1478   | NM_001325  |
|                         | CSTF 77 kD subunit       | <i>CSTF3</i>    | 1479   | NM_001326  |
| CF I                    | CF I - 25 kDa subunit    | <i>NUDT21</i>   | 11051  | NM_007006  |
|                         | CF I - 59 kDa subunit    | <i>FLJ12529</i> | 79869  | NM_024811  |
| CF II                   | CF II - Clp1             | <i>CLP1</i>     | 10978  | NM_006831  |
|                         | CF II - PCF11            | <i>PCF11</i>    | 51585  | NM_015885  |
| Poly(A) polymerase      | Poly(A) polymerase alpha | <i>PAPOLA</i>   | 10914  | NM_032632  |
| Poly(A) binding protein | PABPN1                   | <i>PABPN1</i>   | 8106   | NM_004643  |

## Nuclear Pore Complex (NPC) – 29 genes

| General Description          | Reactome Description         | Symbol        | GeneID | RefSeq Acc |
|------------------------------|------------------------------|---------------|--------|------------|
| Nuclear pore complexes (NPC) | Nup107 [nuclear envelope]    | <i>NUP107</i> | 57122  | NM_020401  |
|                              | Nup133 [nuclear envelope]    | <i>NUP133</i> | 55746  | NM_018230  |
|                              | Nup153 [nucleoplasm]         | <i>NUP153</i> | 9972   | NM_005124  |
|                              | Nup155 [nuclear envelope]    | <i>NUP155</i> | 9631   | NM_004298  |
|                              | Nup160 [nuclear envelope]    | <i>NUP160</i> | 23279  | NM_015231  |
|                              | Nup188 [nuclear envelope]    | <i>NUP188</i> | 23511  | NM_015354  |
|                              | Nup205 [nuclear envelope]    | <i>NUP205</i> | 23165  | NM_015135  |
|                              | Gp210 [nuclear envelope]     | <i>NUP210</i> | 23225  | NM_024923  |
|                              | Nup214 [cytosol]             | <i>NUP214</i> | 8021   | NM_005085  |
|                              | Nup35 [nuclear envelope]     | <i>NUP35</i>  | 129401 | NM_138285  |
|                              | Nup37 [nuclear envelope]     | <i>NUP37</i>  | 79023  | NM_024057  |
|                              | Nup43 [nuclear envelope]     | <i>NUP43</i>  | 348995 | NM_198887  |
|                              | Nup50 [nucleoplasm]          | <i>NUP50</i>  | 10762  | NM_007172  |
|                              | Nup54 [nuclear envelope]     | <i>NUP54</i>  | 53371  | NM_017426  |
|                              | Nup62 [nuclear envelope]     | <i>NUP62</i>  | 23636  | NM_012346  |
|                              | Nup75 [nuclear envelope]     | <i>NUP85</i>  | 79902  | NM_024844  |
|                              | Nup88 [cytosol]              | <i>NUP88</i>  | 4927   | NM_002532  |
|                              | Nup93 [nuclear envelope]     | <i>NUP93</i>  | 9688   | NM_014669  |
|                              | Nup96 [nuclear envelope]     | <i>NUP98</i>  | 4928   | NM_139131  |
|                              | Nup98 [nuclear envelope]     | <i>NUP98</i>  | 4928   | NM_005387  |
|                              | Nup58 [nuclear envelope]     | <i>NUPL1</i>  | 9818   | NM_014089  |
|                              | Nup45 [nuclear envelope]     | <i>NUPL1</i>  | 9818   | NM_014089  |
|                              | NLP1/CG1 [cytosol]           | <i>NUPL2</i>  | 11097  | NM_007342  |
|                              | ALADIN [nuclear envelope]    | <i>AAAS</i>   | 8086   | NM_015665  |
|                              | POM121 [nuclear envelope]    | <i>POM121</i> | 9883   | NM_172020  |
|                              | Rae1/Gle2 [nuclear envelope] | <i>RAE1</i>   | 8480   | NM_003610  |
|                              | Nup358 [cytosol]             | <i>RANBP2</i> | 5903   | NM_006267  |
|                              | Seh1 [nuclear envelope]      | <i>SEH1L</i>  | 81929  | NM_031216  |
|                              | Tpr [nucleoplasm]            | <i>TPR</i>    | 7175   | NM_003292  |

## Translation Initiation, Elongation, and Termination Factor – 37 genes

| General Description    | Reactome Description                              | Symbol          | GeneID | RefSeq Acc |
|------------------------|---------------------------------------------------|-----------------|--------|------------|
| eIF1                   | eIF1                                              | <i>EIF1</i>     | 10209  | NM_005801  |
| eIF1A                  | eIF1A                                             | <i>EIF1AX</i>   | 1964   | NM_001412  |
| eIF2 subunit complex   | eIF2-alpha                                        | <i>EIF2S1</i>   | 1965   | NM_004094  |
|                        | eIF2-alpha                                        | <i>EIF2S2</i>   | 8894   | NM_003908  |
|                        | eIF2-gamma                                        | <i>EIF2S3</i>   | 1968   | NM_001415  |
| eIF2B subunits complex | eIF2B-alpha                                       | <i>EIF2B1</i>   | 1967   | NM_001414  |
|                        | eIF2B-beta                                        | <i>EIF2B2</i>   | 8892   | NM_014239  |
|                        | eIF2B-gamma                                       | <i>EIF2B3</i>   | 8891   | NM_020365  |
|                        | eIF2B-delta                                       | <i>EIF2B4</i>   | 8890   | NM_015636  |
|                        | eIF2B-epsilon                                     | <i>EIF2B5</i>   | 8893   | NM_003907  |
| eIF3 subunit complex   | eIF3-alpha                                        | <i>EIF3S1</i>   | 8669   | NM_003758  |
|                        | eIF3-beta                                         | <i>EIF3S2</i>   | 8668   | NM_003757  |
|                        | eIF3-gamma                                        | <i>EIF3S3</i>   | 8667   | NM_003756  |
|                        | eIF3-delta                                        | <i>EIF3S4</i>   | 8666   | NM_003755  |
|                        | eIF3-epsilon                                      | <i>EIF3S5</i>   | 8665   | NM_003754  |
|                        | eIF3e                                             | <i>EIF3S6</i>   | 3646   | NM_001568  |
|                        | eIF3-zeta                                         | <i>EIF3S7</i>   | 8664   | NM_003753  |
|                        | eIF3c                                             | <i>EIF3S8</i>   | 8663   | NM_003752  |
|                        | eIF3-eta                                          | <i>EIF3S9</i>   | 8662   | NM_003751  |
|                        | eIF3-theta                                        | <i>EIF3S10</i>  | 8661   | NM_003750  |
|                        | eIF3k                                             | <i>EIF3S12</i>  | 27335  | NM_013234  |
| eIF4F                  | eIF4A-I                                           | <i>EIF4A1</i>   | 1973   | NM_001416  |
|                        | eIF4A-II                                          | <i>EIF4A2</i>   | 1974   | NM_001967  |
|                        | eIF4E                                             | <i>EIF4E</i>    | 1977   | NM_001968  |
|                        | 4E-BP                                             | <i>EIF4EBP1</i> | 1978   | NM_004095  |
|                        | eIF4G                                             | <i>EIF4G1</i>   | 1981   | NM_004953  |
|                        | eIF4B                                             | <i>EIF4B</i>    | 1975   | NM_001417  |
|                        | eIF4H                                             | <i>EIF4H</i>    | 7458   | NM_022170  |
|                        | eIF5                                              | <i>EIF5</i>     | 1983   | NM_001969  |
|                        | eIF5B                                             | <i>EIF5B</i>    | 9669   | NM_015904  |
| eEF1A                  | eEF1A                                             | <i>EEF1A1</i>   | 1915   | NM_001402  |
| eEF2                   | eEF2                                              | <i>EEF2</i>     | 1938   | NM_001961  |
| eEF1B subunit complex  | eEF1B alpha                                       | <i>EEF1B2</i>   | 1933   | NM_001959  |
|                        | eEF1B beta                                        | <i>EEF1D</i>    | 1936   | NM_032378  |
|                        | eEF1B gamma                                       | <i>EEF1G</i>    | 1937   | NM_001404  |
| eRF1                   | Eukaryotic peptide chain release factor subunit 1 | <i>ETF1</i>     | 2107   | NM_004730  |
| eRF3                   | eRF3                                              | <i>GSPT2</i>    | 23708  | NM_018094  |

## tRNA Synthetase – 20 genes

| General Description | Description                                 | Symbol | GeneID | RefSeq Acc |
|---------------------|---------------------------------------------|--------|--------|------------|
|                     | alanyl-tRNA synthetase                      | AARS   | 16     | NM_001605  |
|                     | cysteinyI-tRNA synthetase                   | CARS   | 833    | NM_139273  |
|                     | aspartyl-tRNA synthetase                    | DARS   | 1615   | NM_001349  |
|                     | glutamyl-prolyl-tRNA synthetase             | EPRS   | 2058   | NM_004446  |
|                     | phenylalanyl-tRNA synthetase, alpha subunit | FARSA  | 2193   | NM_004461  |
|                     | phenylalanyl-tRNA synthetase, beta subunit  | FARSB  | 10056  | NM_005687  |
|                     | glycyl-tRNA synthetase                      | GARS   | 2617   | NM_002047  |
|                     | histidyl-tRNA synthetase                    | HARS   | 3035   | NM_002109  |
|                     | isoleucyl-tRNA synthetase                   | IARS   | 3376   | NM_002161  |
|                     | lysyl-tRNA synthetase                       | KARS   | 3735   | NM_005548  |
|                     | leucyl-tRNA synthetase                      | LARS   | 51520  | NM_020117  |
|                     | methionyl-tRNA synthetase                   | MARS   | 4141   | NM_004990  |
|                     | asparaginyI-tRNA synthetase                 | NARS   | 4677   | NM_004539  |
|                     | glutaminyl-tRNA synthetase                  | QARS   | 5859   | NM_005051  |
|                     | arginyl-tRNA synthetase                     | RARS   | 5917   | NM_002887  |
|                     | seryl-tRNA synthetase                       | SARS   | 6301   | NM_006513  |
|                     | threonyl-tRNA synthetase                    | TARS   | 6897   | NM_152295  |
|                     | valyl-tRNA synthetase                       | VARS   | 7407   | NM_006295  |
|                     | tryptophanyl-tRNA synthetase                | WARS   | 7453   | NM_004184  |
|                     | tyrosyl-tRNA synthetase                     | YARS   | 8565   | NM_003680  |

## Cytosolic Ribosome – 82 genes

| General Description              | Reactome Description            | Symbol                          | GenelD       | RefSeq Acc |           |
|----------------------------------|---------------------------------|---------------------------------|--------------|------------|-----------|
| 40S ribosomal complex            | 40S small ribosomal protein 2   | RPS2                            | 6187         | NM_002952  |           |
|                                  | 40S small ribosomal protein 3   | RPS3                            | 6188         | NM_001005  |           |
|                                  | 40S small ribosomal protein 3A  | RPS3A                           | 6189         | NM_001006  |           |
|                                  | 40S small ribosomal protein 4   | RPS4X                           | 6191         | NM_001007  |           |
|                                  | 40S small ribosomal protein 4Y  | RPS4Y1                          | 6192         | NM_001008  |           |
|                                  | 40S small ribosomal protein 5   | RPS5                            | 6193         | NM_001009  |           |
|                                  | 40S small ribosomal protein 6   | RPS6                            | 6194         | NM_001010  |           |
|                                  | 40S small ribosomal protein 7   | RPS7                            | 6201         | NM_001011  |           |
|                                  | 40S small ribosomal protein 8   | RPS8                            | 6202         | NM_001012  |           |
|                                  | 40S small ribosomal protein 9   | RPS9                            | 6203         | NM_001013  |           |
|                                  | 40S small ribosomal protein 10  | RPS10                           | 6204         | NM_001014  |           |
|                                  | 40S small ribosomal protein 11  | RPS11                           | 6205         | NM_001015  |           |
|                                  | 40S small ribosomal protein 12  | RPS12                           | 6206         | NM_001016  |           |
|                                  | 40S small ribosomal protein 13  | RPS13                           | 6207         | NM_001017  |           |
|                                  | 40S small ribosomal protein 14  | RPS14                           | 6208         | NM_005617  |           |
|                                  | 40S small ribosomal protein 15  | RPS15                           | 6209         | NM_001018  |           |
|                                  | 40S small ribosomal protein 1A  | RPS15A                          | 6210         | NM_001019  |           |
|                                  | 40S small ribosomal protein 16  | RPS16                           | 6217         | NM_001020  |           |
|                                  | 40S small ribosomal protein 17  | RPS17                           | 6218         | NM_001021  |           |
|                                  | 40S small ribosomal protein 18  | RPS18                           | 6222         | NM_022551  |           |
|                                  | 40S small ribosomal protein 19  | RPS19                           | 6223         | NM_001022  |           |
|                                  | 40S small ribosomal protein 20  | RPS20                           | 6224         | NM_001023  |           |
|                                  | 40S small ribosomal protein 21  | RPS21                           | 6227         | NM_001024  |           |
|                                  | 40S small ribosomal protein 23  | RPS23                           | 6228         | NM_001025  |           |
|                                  | 40S small ribosomal protein 24  | RPS24                           | 6229         | NM_001026  |           |
|                                  | 40S small ribosomal protein 25  | RPS25                           | 6230         | NM_001028  |           |
|                                  | 40S small ribosomal protein 26  | RPS26                           | 6231         | NM_001029  |           |
|                                  | 40S small ribosomal protein 27  | RPS27                           | 6232         | NM_001030  |           |
|                                  | 40S small ribosomal protein 27A | RPS27A                          | 6233         | NM_002954  |           |
|                                  | 40S small ribosomal protein 28  | RPS28                           | 6234         | NM_001031  |           |
|                                  | 40S small ribosomal protein 29  | RPS29                           | 6235         | NM_001032  |           |
|                                  | 40S small ribosomal protein 30  | FAU                             | 2197         | NM_001997  |           |
|                                  | 40S small ribosomal protein P4  | RPSA                            | 3921         | NM_002295  |           |
|                                  | 60S ribosomal complex           | 60S acidic ribosomal protein P0 | RPLP0        | 6175       | NM_001002 |
|                                  |                                 | 60S acidic ribosomal protein P1 | RPLP1        | 6176       | NM_001003 |
|                                  |                                 | 60S acidic ribosomal protein P2 | RPLP2        | 6181       | NM_001004 |
|                                  |                                 | 60S ribosomal protein L3        | RPL3         | 6122       | NM_000967 |
|                                  |                                 | 60S ribosomal protein L3-like   | RPL3L        | 6123       | NM_005061 |
| 60S ribosomal protein L4         |                                 | RPL4                            | 6124         | NM_000968  |           |
| 60S ribosomal protein L5         |                                 | RPL5                            | 6125         | NM_000969  |           |
| 60S ribosomal protein L6         |                                 | RPL6                            | 6128         | NM_000970  |           |
| 60S ribosomal protein L7         |                                 | RPL7                            | 6129         | NM_000971  |           |
| 60S ribosomal protein L7a        |                                 | RPL7A                           | 6130         | NM_000972  |           |
| 60S ribosomal protein L8         |                                 | RPL8                            | 6132         | NM_000973  |           |
| 60S ribosomal protein L9         |                                 | RPL9                            | 6133         | NM_000661  |           |
| 60S ribosomal protein L10        |                                 | RPL10                           | 6134         | NM_006013  |           |
| 60S ribosomal protein L10a       |                                 | RPL10A                          | 4736         | NM_007104  |           |
| 60S ribosomal protein L11        |                                 | RPL11                           | 6135         | NM_000975  |           |
| 60S ribosomal protein L12        |                                 | RPL12                           | 6136         | NM_000976  |           |
| 60S ribosomal protein L13        |                                 | RPL13                           | 6137         | NM_000977  |           |
| 60S ribosomal protein L13a       |                                 | RPL13A                          | 23521        | NM_012423  |           |
| 60S ribosomal protein L14        |                                 | RPL14                           | 9045         | NM_003973  |           |
| 60S ribosomal protein L15        |                                 | RPL15                           | 6138         | NM_002948  |           |
| 60S ribosomal protein L17        |                                 | RPL17                           | 6139         | NM_000985  |           |
| 60S ribosomal protein L18        |                                 | RPL18                           | 6141         | NM_000979  |           |
| 60S ribosomal protein L18a       |                                 | RPL18A                          | 6142         | NM_000980  |           |
| 60S ribosomal protein L19        |                                 | RPL19                           | 6143         | NM_000981  |           |
| 60S ribosomal protein L21        |                                 | RPL21                           | 6144         | NM_000982  |           |
| 60S ribosomal protein L22        |                                 | RPL22                           | 6146         | NM_000983  |           |
| 60S ribosomal protein L23        |                                 | RPL23                           | 9349         | NM_000978  |           |
| 60S ribosomal protein L23a       |                                 | RPL23A                          | 6147         | NM_000984  |           |
| 60S ribosomal protein L24        |                                 | RPL24                           | 6152         | NM_000986  |           |
| 60S ribosomal protein L26        |                                 | RPL26                           | 6154         | NM_000987  |           |
| 60S ribosomal protein L26-like 1 |                                 | RPL26L1                         | 51121        | NM_016093  |           |
| 60S ribosomal protein L27        |                                 | RPL27                           | 6155         | NM_000988  |           |
| 60S ribosomal protein L27a       |                                 | RPL27A                          | 6157         | NM_000990  |           |
| 60S ribosomal protein L28        |                                 | RPL28                           | 6158         | NM_000991  |           |
| 60S ribosomal protein L29        |                                 | RPL29                           | 6159         | NM_000992  |           |
| 60S ribosomal protein L30        |                                 | RPL30                           | 6156         | NM_000989  |           |
| 60S ribosomal protein L31        |                                 | RPL31                           | 6160         | NM_000993  |           |
| 60S ribosomal protein L32        |                                 | RPL32                           | 6161         | NM_000994  |           |
| 60S ribosomal protein L34        |                                 | RPL34                           | 6164         | NM_000995  |           |
| 60S ribosomal protein L35        |                                 | RPL35                           | 11224        | NM_007209  |           |
| 60S ribosomal protein L35a       |                                 | RPL35A                          | 6165         | NM_000996  |           |
| 60S ribosomal protein L36        |                                 | RPL36                           | 25873        | NM_015414  |           |
| 60S ribosomal protein L44        | RPL36A                          | 6173                            | NM_021029    |            |           |
| 60S ribosomal protein L37        | RPL37                           | 6167                            | NM_000997    |            |           |
| 60S ribosomal protein L37a       | RPL37A                          | 6168                            | NM_000998    |            |           |
| 60S ribosomal protein L38        | RPL38                           | 6169                            | NM_000999    |            |           |
| 60S ribosomal protein L39        | RPL39                           | 6170                            | NM_001000    |            |           |
| 60S ribosomal protein L41        | RPL41                           | 6171                            | NM_001035267 |            |           |
| 60S ribosomal protein L40        | UBA52                           | 7311                            | NM_003333    |            |           |

## Ubiquitin Mediated Proteolysis – 45 genes

| General Description | Description                                                                                         | Symbol  | GeneID | RefSeq Acc |
|---------------------|-----------------------------------------------------------------------------------------------------|---------|--------|------------|
|                     | cell division cycle 20 homolog ( <i>S. cerevisiae</i> )                                             | CDC20   | 991    | NM_001255  |
|                     | cell division cycle 27 homolog ( <i>S. cerevisiae</i> )                                             | CDC27   | 996    | NM_001256  |
|                     | cell division cycle 34 homolog ( <i>S. cerevisiae</i> )                                             | CDC34   | 997    | NM_004359  |
|                     | neural precursor cell expressed, developmentally down-regulated 4                                   | NEDD4   | 4734   | NM_006154  |
|                     | S-phase kinase-associated protein 1A (p19A)                                                         | SKP1A   | 6500   | NM_006930  |
|                     | S-phase kinase-associated protein 2 (p45)                                                           | SKP2    | 6502   | NM_005983  |
|                     | transcription elongation factor B (SIII), polypeptide 1 (15kDa, elongin C)                          | TCEB1   | 6921   | NM_005648  |
|                     | transcription elongation factor B (SIII), polypeptide 2 (18kDa, elongin B)                          | TCEB2   | 6923   | NM_007108  |
|                     | ubiquitin-activating enzyme E1 (A1S9T and BN75 temperature sensitivity complementing)               | UBE1    | 7317   | NM_003334  |
|                     | ubiquitin-conjugating enzyme E2D 1 (UBC4/5 homolog, yeast)                                          | UBE2D1  | 7321   | NM_003338  |
|                     | ubiquitin-conjugating enzyme E2D 2 (UBC4/5 homolog, yeast)                                          | UBE2D2  | 7322   | NM_003339  |
|                     | ubiquitin-conjugating enzyme E2D 3 (UBC4/5 homolog, yeast)                                          | UBE2D3  | 7323   | NM_003340  |
|                     | ubiquitin-conjugating enzyme E2E 1 (UBC4/5 homolog, yeast)                                          | UBE2E1  | 7324   | NM_003341  |
|                     | ubiquitin-conjugating enzyme E2E 2 (UBC4/5 homolog, yeast)                                          | UBE2E2  | 7325   | NM_152653  |
|                     | von Hippel-Lindau tumor suppressor                                                                  | VHL     | 7428   | NM_000551  |
|                     | cullin 3                                                                                            | CUL3    | 8452   | NM_003590  |
|                     | cullin 2                                                                                            | CUL2    | 8453   | NM_003591  |
|                     | cullin 1                                                                                            | CUL1    | 8454   | NM_003592  |
|                     | cell division cycle 23 homolog ( <i>S. cerevisiae</i> )                                             | CDC23   | 8697   | NM_004661  |
|                     | cell division cycle 16 homolog ( <i>S. cerevisiae</i> )                                             | CDC16   | 8881   | NM_003903  |
|                     | hect domain and RLD 2                                                                               | HERC2   | 8924   | NM_004667  |
|                     | hect (homologous to the E6-AP (UBE3A) carboxyl terminus) domain and RCC1 (CHC1)-like domain (RLD) 1 | HERC1   | 8925   | NM_003922  |
|                     | beta-transducin repeat containing                                                                   | BTRC    | 8945   | NM_003939  |
|                     | ring-box 1                                                                                          | RBX1    | 9978   | NM_014248  |
|                     | anaphase promoting complex subunit 10                                                               | ANAPC10 | 10393  | NM_014885  |
|                     | ubiquitin-conjugating enzyme E2E 3 (UBC4/5 homolog, yeast)                                          | UBE2E3  | 10477  | NM_006357  |
|                     | WW domain containing E3 ubiquitin protein ligase 1                                                  | WWP1    | 11059  | NM_007013  |
|                     | WW domain containing E3 ubiquitin protein ligase 2                                                  | WWP2    | 11060  | NM_007014  |
|                     | ubiquitin-conjugating enzyme E2C                                                                    | UBE2C   | 11065  | NM_007019  |
|                     | F-box and WD repeat domain containing 11                                                            | FBXW11  | 23291  | NM_012300  |
|                     | neural precursor cell expressed, developmentally down-regulated 4-like                              | NEDD4L  | 23327  | NM_015277  |
|                     | anaphase promoting complex subunit 2                                                                | ANAPC2  | 29882  | NM_013366  |
|                     | anaphase promoting complex subunit 4                                                                | ANAPC4  | 29945  | NM_013367  |
|                     | fizzy/cell division cycle 20 related 1 ( <i>Drosophila</i> )                                        | FZR1    | 51343  | NM_016263  |
|                     | ubiquitin protein ligase E3 component n-recogin 5                                                   | UBR5    | 51366  | NM_015902  |
|                     | anaphase promoting complex subunit 5                                                                | ANAPC5  | 51433  | NM_016237  |
|                     | anaphase promoting complex subunit 7                                                                | ANAPC7  | 51434  | NM_016238  |
|                     | APC11 anaphase promoting complex subunit 11 homolog (yeast)                                         | ANAPC11 | 51529  | NM_016476  |
|                     | ubiquitin-conjugating enzyme E2D 4 (putative)                                                       | UBE2D4  | 51619  | NM_015983  |
|                     | ubiquitin-conjugating enzyme E2R 2                                                                  | UBE2R2  | 54926  | NM_017811  |
|                     | F-box and WD repeat domain containing 7                                                             | FBXW7   | 55294  | NM_033632  |
|                     | SMAD specific E3 ubiquitin protein ligase 1                                                         | SMURF1  | 57154  | NM_020429  |
|                     | anaphase promoting complex subunit 1                                                                | ANAPC1  | 64682  | NM_022662  |
|                     | SMAD specific E3 ubiquitin protein ligase 2                                                         | SMURF2  | 64750  | NM_022739  |
|                     | itchy homolog E3 ubiquitin protein ligase (mouse)                                                   | ITCH    | 83737  | NM_031483  |

## Proteasome – 43 genes

| General Description | Description                            | Symbol | GeneID | RefSeq Acc   |
|---------------------|----------------------------------------|--------|--------|--------------|
|                     | proteasome subunit, alpha type, 1      | PSMA1  | 5682   | NM_002786    |
|                     | proteasome subunit, alpha type, 2      | PSMA2  | 5683   | NM_002787    |
|                     | proteasome subunit, alpha type, 3      | PSMA3  | 5684   | NM_002788    |
|                     | proteasome subunit, alpha type, 4      | PSMA4  | 5685   | NM_002789    |
|                     | proteasome subunit, alpha type, 5      | PSMA5  | 5686   | NM_002790    |
|                     | proteasome subunit, alpha type, 6      | PSMA6  | 5687   | NM_002791    |
|                     | proteasome subunit, alpha type, 7      | PSMA7  | 5688   | NM_002792    |
|                     | proteasome subunit, alpha type, 8      | PSMA8  | 143471 | NM_001025096 |
|                     | proteasome subunit, beta type, 1       | PSMB1  | 5689   | NM_002793    |
|                     | proteasome subunit, beta type, 2       | PSMB2  | 5690   | NM_002794    |
|                     | proteasome subunit, beta type, 3       | PSMB3  | 5691   | NM_002795    |
|                     | proteasome subunit, beta type, 4       | PSMB4  | 5692   | NM_002796    |
|                     | proteasome subunit, beta type, 5       | PSMB5  | 5693   | NM_002797    |
|                     | proteasome subunit, beta type, 6       | PSMB6  | 5694   | NM_002798    |
|                     | proteasome subunit, beta type, 7       | PSMB7  | 5695   | NM_002799    |
|                     | proteasome subunit, beta type, 8       | PSMB8  | 5696   | NM_004159    |
|                     | proteasome subunit, beta type, 9       | PSMB9  | 5698   | NM_002800    |
|                     | proteasome subunit, beta type, 10      | PSMB10 | 5699   | NM_002801    |
|                     | proteasome 26S subunit, ATPase, 1      | PSMC1  | 5700   | NM_002802    |
|                     | proteasome 26S subunit, ATPase, 2      | PSMC2  | 5701   | NM_002803    |
|                     | proteasome 26S subunit, ATPase, 3      | PSMC3  | 5702   | NM_002804    |
|                     | proteasome 26S subunit, ATPase, 4      | PSMC4  | 5704   | NM_006503    |
|                     | proteasome 26S subunit, ATPase, 5      | PSMC5  | 5705   | NM_002805    |
|                     | proteasome 26S subunit, ATPase, 6      | PSMC6  | 5706   | NM_002806    |
|                     | proteasome 26S subunit, non-ATPase, 1  | PSMD1  | 5707   | NM_002807    |
|                     | proteasome 26S subunit, non-ATPase, 2  | PSMD2  | 5708   | NM_002808    |
|                     | proteasome 26S subunit, non-ATPase, 3  | PSMD3  | 5709   | NM_002809    |
|                     | proteasome 26S subunit, non-ATPase, 4  | PSMD4  | 5710   | NM_002810    |
|                     | proteasome 26S subunit, non-ATPase, 5  | PSMD5  | 5711   | NM_005047    |
|                     | proteasome 26S subunit, non-ATPase, 6  | PSMD6  | 9861   | NM_014814    |
|                     | proteasome 26S subunit, non-ATPase, 7  | PSMD7  | 5713   | NM_002811    |
|                     | proteasome 26S subunit, non-ATPase, 8  | PSMD8  | 5714   | NM_002812    |
|                     | proteasome 26S subunit, non-ATPase, 9  | PSMD9  | 5715   | NM_002813    |
|                     | proteasome 26S subunit, non-ATPase, 10 | PSMD10 | 5716   | NM_002814    |
|                     | proteasome 26S subunit, non-ATPase, 11 | PSMD11 | 5717   | NM_002815    |
|                     | proteasome 26S subunit, non-ATPase, 12 | PSMD12 | 5718   | NM_002816    |
|                     | proteasome 26S subunit, non-ATPase, 13 | PSMD13 | 5719   | NM_002817    |
|                     | proteasome 26S subunit, non-ATPase, 14 | PSMD14 | 10213  | NM_005805    |
|                     | proteasome activator subunit 1         | PSME1  | 5720   | NM_006263    |
|                     | proteasome activator subunit 2         | PSME2  | 5721   | NM_002818    |
|                     | proteasome activator subunit 3         | PSME3  | 10197  | NM_005789    |
|                     | proteasome activator subunit 4         | PSME4  | 23198  | NM_014614    |
|                     | proteasome inhibitor subunit 1         | PSMF1  | 9491   | NM_006814    |
